# Supplementary material for: Structure and properties of a new double-stranded tetranuclear [CuII2]2 helicate
Source: Royal Society of Chemistry journal article supplement (doi:10.1039/b514126e), 2006-01-01
Supplement: b514126e.pdf [file b514126e.pdf]

## Supplementary materials

---

### Structure and Properties of a New Double-Stranded $[\text{Cu}^{\text{II}}_2]_2$ Cluster Helicate

Manindranath Bera,<sup>a</sup> Guillem Aromi,<sup>b</sup> Wing Tak Wong<sup>c</sup> and Debashis Ray<sup>\*,a</sup>

---

**Preparation of 1:** To a solution of  $\text{H}_2\text{L}$  (0.5 g, 1.09 mmol) in methanol (30 ml) was added dropwise an aqueous solution of  $\text{Cu}(\text{ClO}_4)_2 \cdot 6\text{H}_2\text{O}$  (0.789 g, 2.18 mmol) with magnetic stirring during 15 min. After  $\frac{1}{2}$  an hr., an aqueous solution of  $\text{NEt}_3$  (0.17 g, 1.16 mmol) was slowly added to the previous solution during 10 min. The reaction mixture was then stirred for another 30 min. The resulting dark green solution was then kept in air. The green microcrystalline solid compound was separated out, collected by filtration through glass frit and washed thoroughly with hexane. The compound was finally dried in vacuo over  $\text{P}_4\text{O}_{10}$ . The single crystals suitable for X-ray analysis was obtained from 1:1(v/v) MeOH- $\text{H}_2\text{O}$  during 6 days. Yield: 0.836 g (80 %). Anal. Calcd for  $\text{C}_{28}\text{H}_{52}\text{N}_{12}\text{O}_{22}\text{Cl}_4\text{Cu}_4$ : C 25.77, H 4.02, N 12.88, Cu 19.48. Found: C 25.41, H 3.98, N 12.51, Cu 19.42 %. IR (KBr,  $\text{cm}^{-1}$ ):  $\nu = 3424(\text{b}), 3287(\text{b}), 1623(\text{vs}), 1589(\text{s}), 1383(\text{s}), 1203(\text{s}), 1082(\text{s}), 963(\text{s}), 815(\text{s}), 738(\text{s})$ . Molar conductance,  $\Lambda_M$ : (MeCN solution)  $465 \text{ ohm}^{-1} \text{ cm}^2 \text{ mol}^{-1}$ . UV-vis spectra [ $\lambda_{\text{max}}$ , nm ( $\epsilon$ ,  $\text{lmol}^{-1}\text{cm}^{-1}$ ): (MeCN solution) 549 (1770), 457 (580), 269 (18470), 235 (17575). Room temperature  $\mu_{\text{eff}}$  (tot.):  $2.90\mu_B$ ;  $\mu_{\text{eff}} / \text{Cu}$ :  $1.45\mu_B$ .

#### Figures with captions

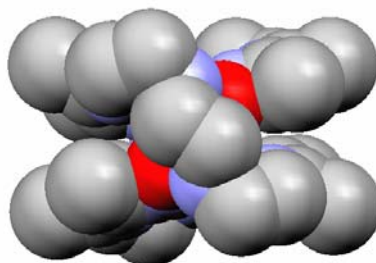

**Fig. S1** Space filling representation of  $[\text{Cu}_4(\mu_4\text{-L})_2]^{4+}$  showing the double-stranded helix.

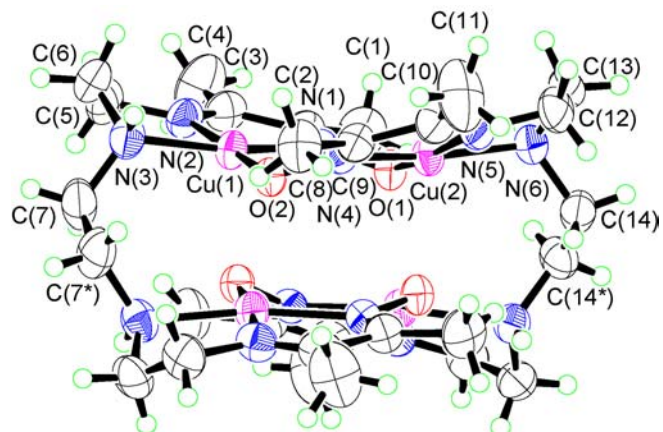

**Fig. S2** Side view of  $[\text{Cu}_4(\mu_4\text{-L})_2]^{4+}$ . Hydrogen atoms were shown as circles of arbitrary size.

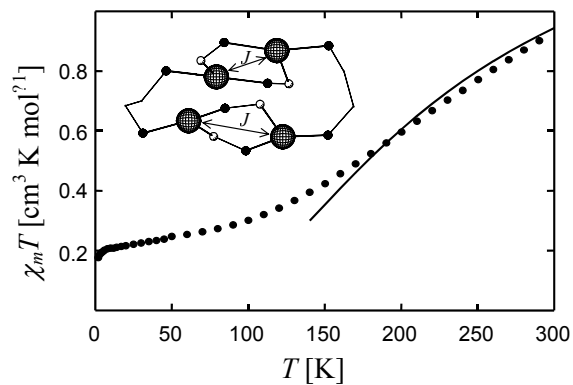

**Fig. S3** Plot of experimental  $\chi_m T$  vs  $T$  for  $[\text{Cu}_4(\mu_4\text{-L})_2]^{4+}$ . The solid line is a fit to the high temperature experimental data (See text for details). In the inset is a PLATON representation of the core of the complex.
